# Supplementary material
Source: PubMed Central journal article supplement (PMC8928483)
Supplement: NIHMS1783093-supplement-SI.pdf [file NIHMS1783093-supplement-SI.pdf]

## Supporting Information

# Ligandability of E3 Ligases for Targeted Protein Degradation Applications

Bridget P. Belcher<sup>1,2,3</sup>, Carl C. Ward<sup>1,2,3,4</sup>, and Daniel K. Nomura<sup>1,2,3,4</sup> \*

<sup>1</sup> Department of Chemistry, University of California, Berkeley, Berkeley, CA 94720 USA

<sup>2</sup> Novartis-Berkeley Center for Proteomics and Chemistry Technologies, Berkeley, CA 94720

<sup>3</sup> Innovative Genomics Institute, Berkeley, CA 94720 USA.

<sup>4</sup> Department of Molecular and Cell Biology, University of California, Berkeley, Berkeley, CA 94720 USA

\*correspondence to [dnomura@berkeley.edu](mailto:dnomura@berkeley.edu)

**Table S1. Aggregate quantified chemoproteomic data of probe-modified peptides for E3 ligases and other components of the ubiquitin proteasome machinery.** We have aggregated all of our chemoproteomic data from 455 distinct experiments using the alkyne-functionalized iodoacetamide probe and the isoTOP-ABPP method first reported by Weerapana and Cravatt *et al.*<sup>1</sup> across various human cell line proteomes. We have quantified the total number of spectral counts for each tryptic peptide identified within each E3 ligase family member across all experiments. These include data from our research group's published papers as well as our currently unpublished studies all using the same methods described in these studies<sup>2-17</sup>. We have consolidated redundant probe-modified peptides as much as we can and have added the total number of spectral counts and aggregate numbers of experiments where each probe-modified peptide was identified across the 455 distinct chemoproteomic experiments.

**Tab 1** shows a summary of E3 ligases and other components of the ubiquitin proteasome machinery that we searched against our ligandability database with total probe-modified peptide spectral counts and experiments for each protein, separated out by the various classes of E3 ligases.

**Tabs 2-10** list the individual E3 ligases, the Uniprot ID for each E3 ligase, the probe-modified peptide sequence with the modified cysteine annotated by a "\*" next to the cysteine, the cysteine number, the probe used (which is all cases is the alkyne-functionalized iodoacetamide probe abbreviated as lAyne), aggregate spectral counts for each probe-modified site, and aggregate number of experiments in which the probe-modified peptide was found.

## References

- (1) Weerapana, E.; Wang, C.; Simon, G. M.; Richter, F.; Khare, S.; Dillon, M. B. D.; Bachovchin, D. A.; Mowen, K.; Baker, D.; Cravatt, B. F. Quantitative Reactivity Profiling Predicts Functional Cysteines in Proteomes. *Nature* **2010**, *468* (7325), 790–795. <https://doi.org/10.1038/nature09472>.
- (2) Ward, C. C.; Kleinman, J. I.; Brittain, S. M.; Lee, P. S.; Chung, C. Y. S.; Kim, K.; Petri, Y.; Thomas, J. R.; Tallarico, J. A.; McKenna, J. M.; Schirle, M.; Nomura, D. K. Covalent Ligand Screening Uncovers a RNF4 E3 Ligase Recruiter for Targeted Protein Degradation Applications. *ACS Chem. Biol.* **2019**, *14* (11), 2430–2440. <https://doi.org/10.1021/acscchembio.8b01083>.
- (3) Luo, M.; Spradlin, J. N.; Boike, L.; Tong, B.; Brittain, S. M.; McKenna, J. M.; Tallarico, J. A.; Schirle, M.; Maimone, T. J.; Nomura, D. K. Chemoproteomics-Enabled Discovery of Covalent RNF114-Based Degraders That Mimic Natural Product Function. *Cell Chem. Biol.* **2021**, *28* (4), 559-566.e15. <https://doi.org/10.1016/j.chembiol.2021.01.005>.
- (4) Spradlin, J. N.; Hu, X.; Ward, C. C.; Brittain, S. M.; Jones, M. D.; Ou, L.; To, M.; Proudfoot, A.; Ornelas, E.; Woldegiorgis, M.; Olzmann, J. A.; Bussiere, D. E.; Thomas, J. R.; Tallarico, J. A.; McKenna, J. M.; Schirle, M.; Maimone, T. J.; Nomura, D. K. Harnessing the Anti-Cancer Natural Product Nimbolide for Targeted Protein Degradation. *Nat. Chem. Biol.* **2019**, *15* (7), 747–755. <https://doi.org/10.1038/s41589-019-0304-8>.
- (5) Grossman, E. A.; Ward, C. C.; Spradlin, J. N.; Bateman, L. A.; Huffman, T. R.; Miyamoto, D. K.; Kleinman, J. I.; Nomura, D. K. Covalent Ligand Discovery against Druggable Hotspots Targeted by Anti-Cancer Natural Products. *Cell Chem. Biol.* **2017**, *24* (11), 1368-1376.e4. <https://doi.org/10.1016/j.chembiol.2017.08.013>.
- (6) Bateman, L. A.; Nguyen, T. B.; Roberts, A. M.; Miyamoto, D. K.; Ku, W.-M.; Huffman, T. R.; Petri, Y.; Heslin, M. J.; Contreras, C. M.; Skibola, C. F.; Olzmann, J. A.; Nomura, D. K. Chemoproteomics-Enabled Covalent Ligand Screen Reveals a Cysteine Hotspot in Reticulon 4 That Impairs ER Morphology and Cancer Pathogenicity. *Chem. Commun. Camb. Engl.* **2017**, *53* (53), 7234–7237. <https://doi.org/10.1039/c7cc01480e>.
- (7) Chung, C. Y.-S.; Shin, H. R.; Berdan, C. A.; Ford, B.; Ward, C. C.; Olzmann, J. A.; Zoncu, R.; Nomura, D. K. Covalent Targeting of the Vacuolar H<sup>+</sup>-ATPase Activates Autophagy via MTORC1 Inhibition. *Nat. Chem. Biol.* **2019**, *15* (8), 776–785. <https://doi.org/10.1038/s41589-019-0308-4>.
- (8) Henning, N. J.; Boike, L.; Spradlin, J. N.; Ward, C. C.; Belcher, B.; Brittain, S. M.; Hesse, M.; Dovala, D.; McGregor, L. M.; McKenna, J. M.; Tallarico, J. A.; Schirle, M.; Nomura, D. K. Deubiquitinase-Targeting Chimeras for Targeted Protein Stabilization. *bioRxiv* **2021**, 2021.04.30.441959. <https://doi.org/10.1101/2021.04.30.441959>.

- (9) Counihan, J. L.; Wiggerhorn, A. L.; Anderson, K. E.; Nomura, D. K. Chemoproteomics-Enabled Covalent Ligand Screening Reveals ALDH3A1 as a Lung Cancer Therapy Target. *ACS Chem. Biol.* **2018**, *13* (8), 1970–1977. <https://doi.org/10.1021/acscchembio.8b00381>.
- (10) Counihan, J. L.; Duckering, M.; Dalvie, E.; Ku, W.-M.; Bateman, L. A.; Fisher, K. J.; Nomura, D. K. Chemoproteomic Profiling of Acetanilide Herbicides Reveals Their Role in Inhibiting Fatty Acid Oxidation. *ACS Chem. Biol.* **2017**, *12* (3), 635–642. <https://doi.org/10.1021/acscchembio.6b01001>.
- (11) Ford, B.; Bateman, L. A.; Gutierrez-Palominos, L.; Park, R.; Nomura, D. K. Mapping Proteome-Wide Targets of Glyphosate in Mice. *Cell Chem. Biol.* **2017**, *24* (2), 133–140. <https://doi.org/10.1016/j.chembiol.2016.12.013>.
- (12) Boike, L.; Cioffi, A. G.; Majewski, F. C.; Co, J.; Henning, N. J.; Jones, M. D.; Liu, G.; McKenna, J. M.; Tallarico, J. A.; Schirle, M.; Nomura, D. K. Discovery of a Functional Covalent Ligand Targeting an Intrinsically Disordered Cysteine within MYC. *Cell Chem. Biol.* **2021**, *28* (1), 4-13.e17. <https://doi.org/10.1016/j.chembiol.2020.09.001>.
- (13) Isobe, Y.; Okumura, M.; McGregor, L. M.; Brittain, S. M.; Jones, M. D.; Liang, X.; White, R.; Forrester, W.; McKenna, J. M.; Tallarico, J. A.; Schirle, M.; Maimone, T. J.; Nomura, D. K. Manumycin Polyketides Act as Molecular Glues between UBR7 and P53. *Nat. Chem. Biol.* **2020**, *16* (11), 1189–1198. <https://doi.org/10.1038/s41589-020-0557-2>.
- (14) Cho, H.; Shen, Q.; Zhang, L. H.; Okumura, M.; Kawakami, A.; Ambrose, J.; Sigoillot, F.; Miller, H. R.; Gleim, S.; Cobos-Correa, A.; Wang, Y.; Piechon, P.; Roma, G.; Eggimann, F.; Moore, C.; Aspesi, P.; Mapa, F. A.; Burks, H.; Ross, N. T.; Krastel, P.; Hild, M.; Maimone, T. J.; Fisher, D. E.; Nomura, D. K.; Tallarico, J. A.; Canham, S. M.; Jenkins, J. L.; Forrester, W. C. CYP27A1-Dependent Anti-Melanoma Activity of Limonoid Natural Products Targets Mitochondrial Metabolism. *Cell Chem. Biol.* **2021**, S2451-9456(21)00143-4. <https://doi.org/10.1016/j.chembiol.2021.03.004>.
- (15) Berdan, C. A.; Ho, R.; Lehtola, H. S.; To, M.; Hu, X.; Huffman, T. R.; Petri, Y.; Altobelli, C. R.; Demeulenaere, S. G.; Olzmann, J. A.; Maimone, T. J.; Nomura, D. K. Parthenolide Covalently Targets and Inhibits Focal Adhesion Kinase in Breast Cancer Cells. *Cell Chem. Biol.* **2019**, *26* (7), 1027-1035.e22. <https://doi.org/10.1016/j.chembiol.2019.03.016>.
- (16) Roberts, A. M.; Miyamoto, D. K.; Huffman, T. R.; Bateman, L. A.; Ives, A. N.; Akopian, D.; Heslin, M. J.; Contreras, C. M.; Rape, M.; Skibola, C. F.; Nomura, D. K. Chemoproteomic Screening of Covalent Ligands Reveals UBA5 As a Novel Pancreatic Cancer Target. *ACS Chem. Biol.* **2017**, *12* (4), 899–904. <https://doi.org/10.1021/acscchembio.7b00020>.
- (17) Roberts, L. S.; Yan, P.; Bateman, L. A.; Nomura, D. K. Mapping Novel Metabolic Nodes Targeted by Anti-Cancer Drugs That Impair Triple-Negative Breast Cancer Pathogenicity. *ACS Chem. Biol.* **2017**, *12* (4), 1133–1140. <https://doi.org/10.1021/acscchembio.6b01159>.
